# Supplementary material
Source: Springer Nature journal article supplement (https://www.springermedizin.de/resource/supplementary/12883_2014_1033_MOESM2_ESM.pdf/9456406)
Supplement: MOESM2 [file 9456406]

# Deep brain stimulation for essential tremor

## Follow-up questionnaire for patients

### Personal data:

Name:

Date of birth:

Date of operation for deep brain stimulation:

**Please tick all relevant boxes, if needed please give further details below**

#### 1. Status of work situation before operation:

- a. Full time job
- b. No work
- c. Partly sick leave
- d. Disability benefit
- e. Retired

#### 2. Status of work situation after operation

- a. Full time job
- b. No work
- c. Partly sick leave
- d. Disability benefit
- e. Retired

#### 3. Status of work situation today:

- a. Same profession as before operation
- b. New profession after the operation

Describe: \_\_\_\_\_

- i. Full time job
- ii. No work
- iii. Partly sick leave
- iv. Disability benefit
- v. Retired

#### 4. Any use of medication before the operation:

- a. No
- b. Yes

Describe what type of medication you used:

\_\_\_\_\_

**5. Any use of medication after the operation:**

- a. No   
b. Yes

Describe what kind of medication you used:

---

**6. Any use of medication today:**

- a. No   
b. Yes

Describe what kind of medication you use:

---

**7. Other diseases:**

- a. Epilepsy   
b. Anxiety   
c. Depression   
d. Lung-cancer   
e. Other cancer  Type: \_\_\_\_\_  
f. Asthma   
g. Dupuytren's contraction   
(fixed contraction of the hand )  
h. Glaucoma   
i. Cataract   
j. Heart disease  Type: \_\_\_\_\_  
k. Other  Type: \_\_\_\_\_

**8. Were you born before term?**

- a. No   
b. Yes  Number of days: \_\_\_\_\_

**9. Did you suffer from depression before the operation** (please place a vertical mark on the line to indicate how depressed you were)?

Not depressed \_\_\_\_\_ Deeply depressed

**10. Were you depressed after the operation** (please place a vertical mark on the line to indicate how depressed you were)?

Not depressed \_\_\_\_\_ Deeply depressed

**11. Do you feel depressed today** (please place a vertical mark on the line to indicate how depressed you are)?

Not depressed \_\_\_\_\_ Deeply depressed

**12. Did you suffer from anxiety before the operation** (please place a vertical mark on the line to indicate how much you suffered from anxiety)?

No \_\_\_\_\_ Incapacitating  
anxiety anxiety

**13. Did you suffer from anxiety after the operation** (please place a vertical mark on the line to indicate how much you suffered from anxiety)?

No \_\_\_\_\_ Incapacitating  
anxiety anxiety

**14. Do you suffer from anxiety today** (please place a vertical mark on the line to indicate how much you suffer from anxiety)?

No \_\_\_\_\_ Incapacitating  
anxiety anxiety

**15. Side- effects of deep brain stimulation**

- a. Numbness
- b. Headache
- c. Abnormal taste
- d. Dysarthria
- e. Discomfort tongue
- f. Dizziness
- g. Other

Type: \_\_\_\_\_

**16. Self-reported effect of deep brain stimulation on tremor initially after first operation**  
(please place a vertical mark on the line to indicate the effect from deep brain stimulation on your tremor)?

No \_\_\_\_\_ All tremor  
effect gone

**17. Self-reported effect of deep brain stimulation on tremor today** (please place a vertical mark on the line to indicate the effect from deep brain stimulation on your tremor)?

No \_\_\_\_\_ All tremor  
effect gone

**18. If you have experienced reduced effect of deep brain stimulation on tremor, how long has this lasted?**

Number of years or months: \_\_\_\_\_

**19. Are you satisfied that you have received deep brain stimulation** (please place a vertical mark on the line to indicate how satisfied you are)?

Very \_\_\_\_\_ Very  
unsatisfied satisfied

Comments:

**20. General comments:**
